# Supplementary material
Source: publisher figshare collection journal article supplement (https://karger.figshare.com/ndownloader/files/33079190)
Supplement: Supplementary file 1 [file 33079190]

| Author, year | Recruitment time | Setting | Mean age (years) | | Most common etiology | Ranson score | |
| --- | --- | --- | --- | --- | --- | --- | --- |
| Experimental | Control | Experimental | Control |
| Dellinger, 2007 | 2003.2-2004.12 | Multicenter | 54.4 | 49.6 | Alcohol | 4.5 | 3.8 |
| Ho, 1997 | 1982-1996 | Single-center | NR | NR | NR | NR | NR |
| Nakaharai, 2018 | 2010.7-2016.3 | Multicenter | 66.3 | 64.2 | NR | NR | NR |
| Nordback, 2001 | 1995.9-1999.5 | Single-center | 47.0 | 46.0 | Alcohol | NR | NR |
| Poropat, 2019 | 2014.0-2016.12 | Single-center | 74.0 | 74.0 | Biliary | NR | NR |
| Rokke, 2007 | 1997-2002 | Multicenter | 60.0 | 57.0 | Biliary | NR | NR |
| Xue, 2009 | 2007.2-2007.12 | Single-center | 48.4 | 47.5 | Biliary | 4.8 | 5.3 |

Supplementary Table 2-1. Characteristics of all the studies included in the meta-analysis.

NR, not reported.
